# Supplementary material
Source: HighWire-hosted journal article supplement (http://ajnr-stage2.highwire.org/highwire/filestream/183069/field_highwire_adjunct_files/0/20-00366.pdf)
Supplement: 20-00366.pdf [file 20-00366.pdf]

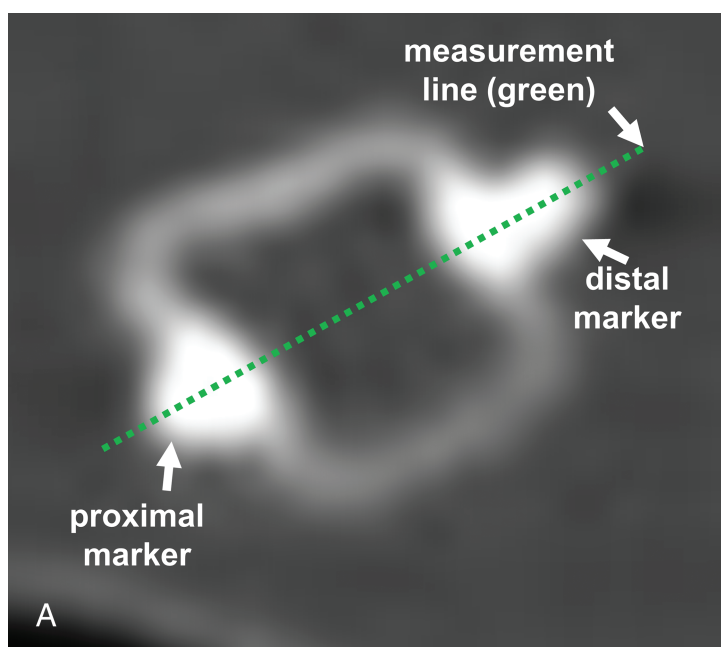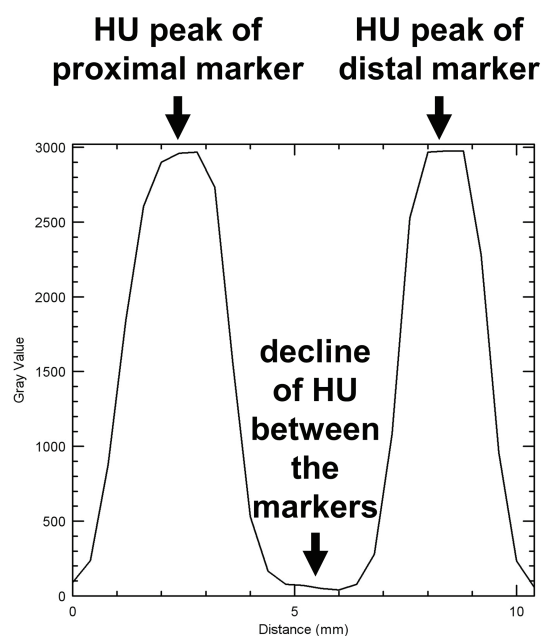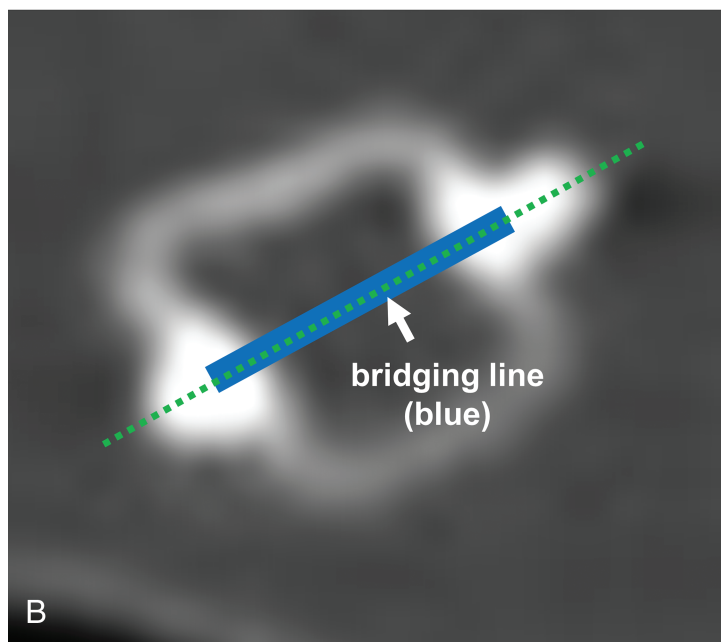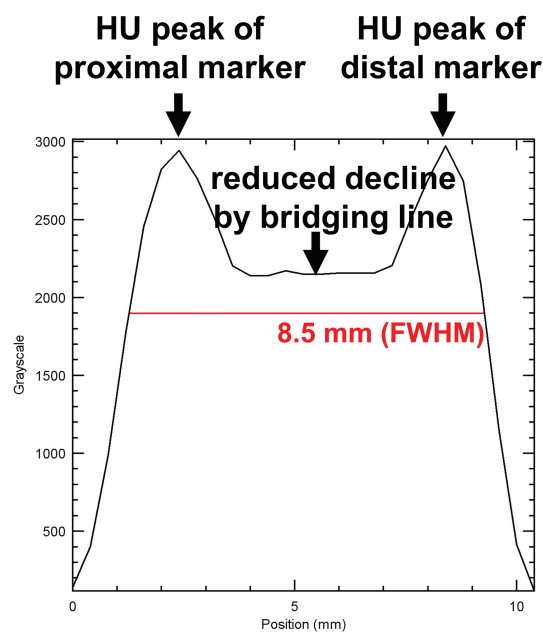

**ON-LINE FIG 1.** WEB device height is assessed by a semiautomatic approach in several steps: First, the WEB device (A) is reconstructed with overturning of the principal axis to the maximum distance between the proximal marker (near the aneurysm neck) and the distal marker (near the aneurysm apex). At this step, the Hounsfield unit (HU) profile plot (on the right) on the placed measurement line (*green dashed line on the left*) reveals an HU peak of the proximal and distal marker with a deep decline of the HU values between the 2 markers, preventing calculating the full width at half maximum. Second, the distance between the 2 markers is bridged by placing a line (B, *blue line on the left*) specifically chosen to be slightly less attenuated than the WEB markers. Thus, the full width at half maximum is software-determined due to a reduced decline in the gap between the 2 markers (profile plot on the right).

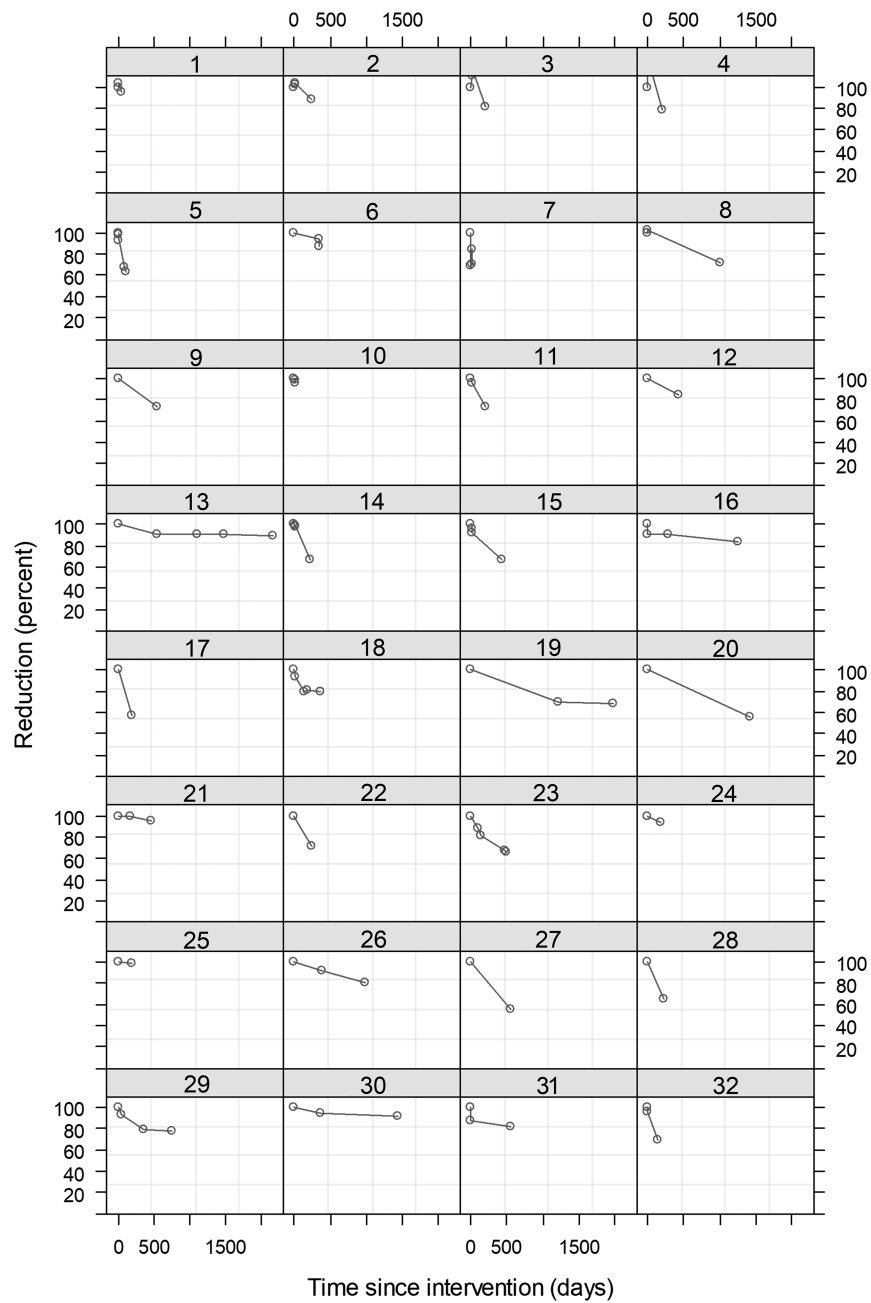

**ON-LINE FIG 2.** Decrease of WEB height with time in days is illustrated in each case of investigated WEB-treated aneurysm as a *line graph*.
